# Supplementary material for: Selective magnetic particle imaging of CD44 expressing cells using iron oxide nanoprobes functionalized with chemically modified hyaluronan
Source: Royal Society of Chemistry journal article supplement (doi:10.1039/d5na00979k), 2026-06-16
Supplement: d5na00979k1.pdf [file d5na00979k1.pdf]

## Selective Magnetic Particle Imaging of CD44 Expressing Cells Using Iron Oxide Nanoprobes Functionalized with Chemically Modified Hyaluronan

Mohammad H. El-Dakdouki<sup>a\*</sup>, Chia-wei Yang<sup>b</sup>, A. K. M. Atique Ullah<sup>b</sup>, Fei Fan<sup>b</sup>, Kunli Liu<sup>b</sup>, Baraah U. Hijazi<sup>b</sup>, and Xuefei Huang<sup>b,c,d\*</sup>

<sup>a</sup> *Department of Chemistry, Faculty of Science, Beirut Arab University, P.O. Box 11-5020, Riad El Solh 11072809, Beirut, Lebanon*

<sup>b</sup> *Department of Chemistry, Michigan State University, 578 S. Shaw Lane, East Lansing, MI 48824, USA*

<sup>c</sup> *Institute for Quantitative Health Science and Engineering, Michigan State University, East Lansing, MI 48824, USA*

<sup>d</sup> *Department of Biomedical Engineering, Michigan State University, East Lansing, MI 48824, USA*

(SUPPORTING INFORMATION)

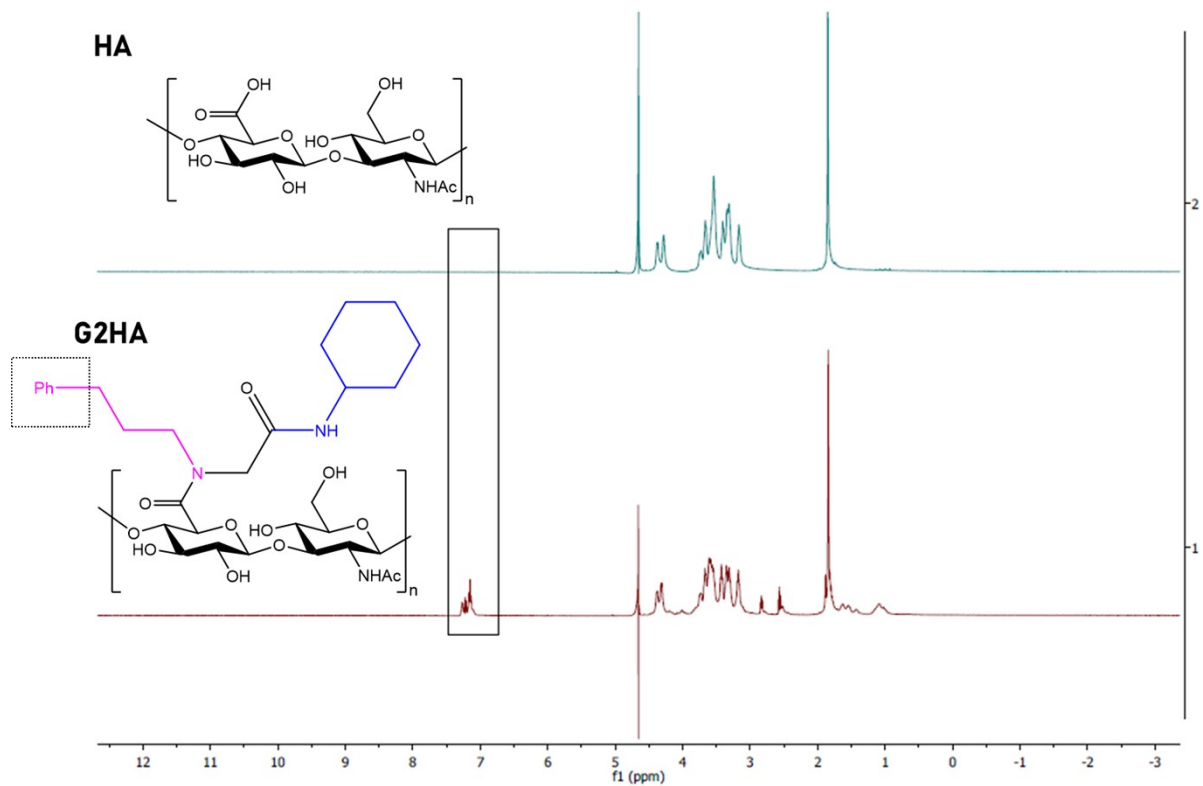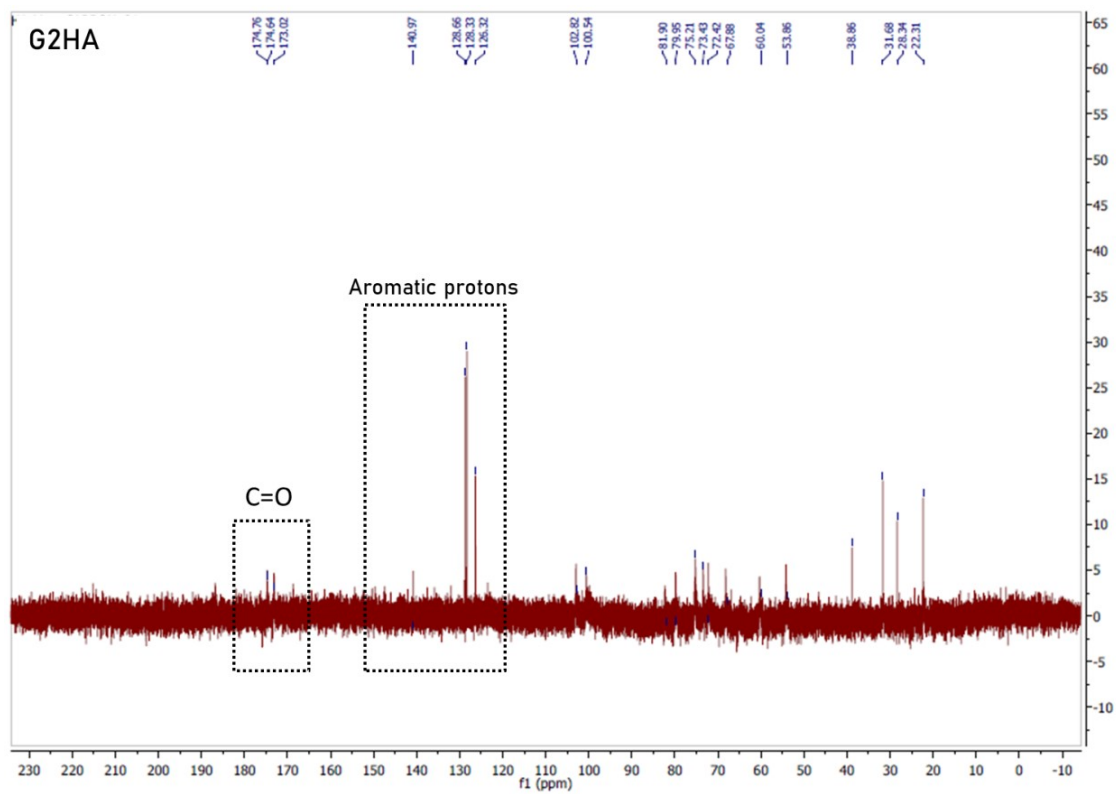

**Fig. S1** (a)  $^1\text{H}$ -NMR of HA and G2HA spectra; (b)  $^{13}\text{C}$ -NMR spectrum for G2HA.

|                                | Size (d.nm):  | % Intensity: | St Dev (d |
|--------------------------------|---------------|--------------|-----------|
| <b>Z-Average (d.nm):</b> 134.1 | Peak 1: 158.6 | 100.0        | 69.08     |
| <b>Pdl:</b> 0.175              | Peak 2: 0.000 | 0.0          | 0.000     |
| <b>Intercept:</b> 0.941        | Peak 3: 0.000 | 0.0          | 0.000     |
| <b>Result quality:</b> Good    |               |              |           |

Size Distribution by Intensity

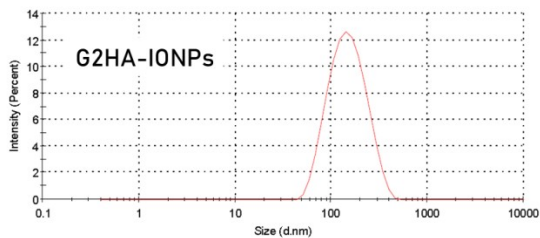

|                                      | Mean (mV)     | Area (%) | St Dev (mV) |
|--------------------------------------|---------------|----------|-------------|
| <b>Zeta Potential (mV):</b> -44.2    | Peak 1: -44.2 | 100.0    | 7.53        |
| <b>Zeta Deviation (mV):</b> 7.53     | Peak 2: 0.00  | 0.0      | 0.00        |
| <b>Conductivity (mS/cm):</b> 0.00697 | Peak 3: 0.00  | 0.0      | 0.00        |
| <b>Result quality:</b> Good          |               |          |             |

Zeta Potential Distribution

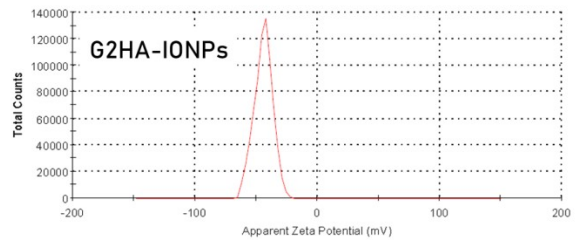

|                                | Size (d.nm):  | % Intensity: | St Dev (d.n |
|--------------------------------|---------------|--------------|-------------|
| <b>Z-Average (d.nm):</b> 114.1 | Peak 1: 138.4 | 100.0        | 60.26       |
| <b>Pdl:</b> 0.164              | Peak 2: 0.000 | 0.0          | 0.000       |
| <b>Intercept:</b> 0.955        | Peak 3: 0.000 | 0.0          | 0.000       |
| <b>Result quality:</b> Good    |               |              |             |

Size Distribution by Intensity

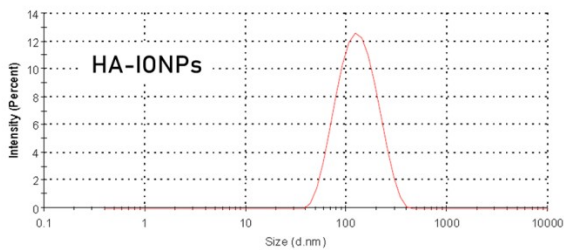

|                                      | Mean (mV)     | Area (%) | St Dev (mV) |
|--------------------------------------|---------------|----------|-------------|
| <b>Zeta Potential (mV):</b> -27.7    | Peak 1: -27.7 | 100.0    | 5.34        |
| <b>Zeta Deviation (mV):</b> 5.34     | Peak 2: 0.00  | 0.0      | 0.00        |
| <b>Conductivity (mS/cm):</b> 0.00332 | Peak 3: 0.00  | 0.0      | 0.00        |
| <b>Result quality:</b> Good          |               |          |             |

Zeta Potential Distribution

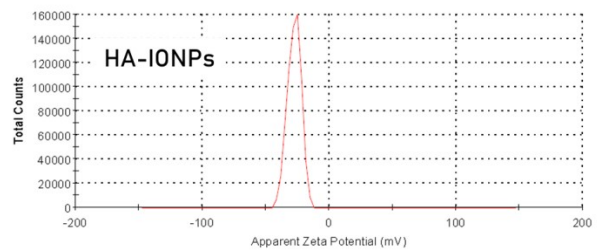

**Fig. S2** Hydrodynamic diameter, polydispersity index (PDI), and zeta potential of G2HA-IONPs and HA-IONPs.

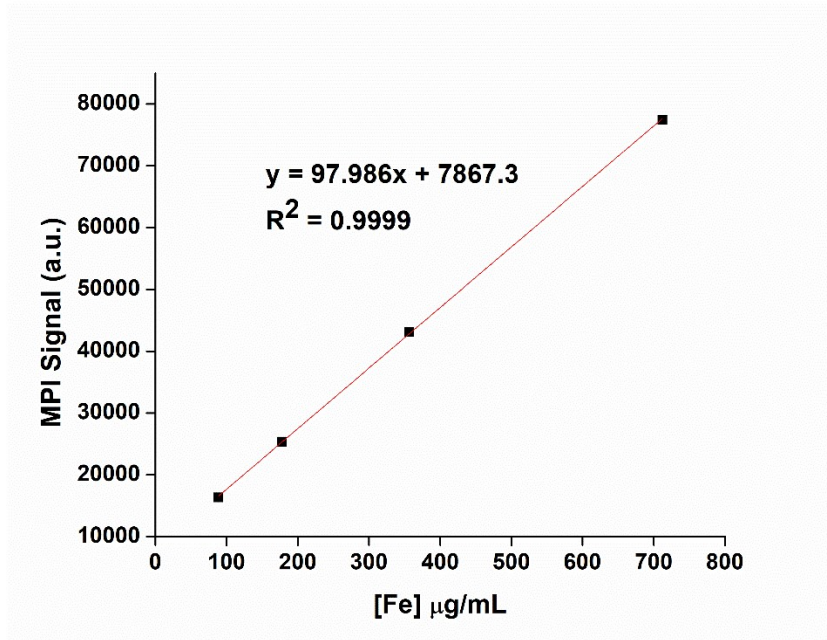

**Fig. S3** MPI signal of serial dilutions of HA-IONPs solution showing the linear relationship between iron concentration and the generated MPI signal.
